# Supplementary material
Source: Springer Nature journal article supplement (https://www.springermedizin.de/resource/supplementary/12936_2007_389_MOESM5_ESM.pdf/9547700)

# Parasite Load

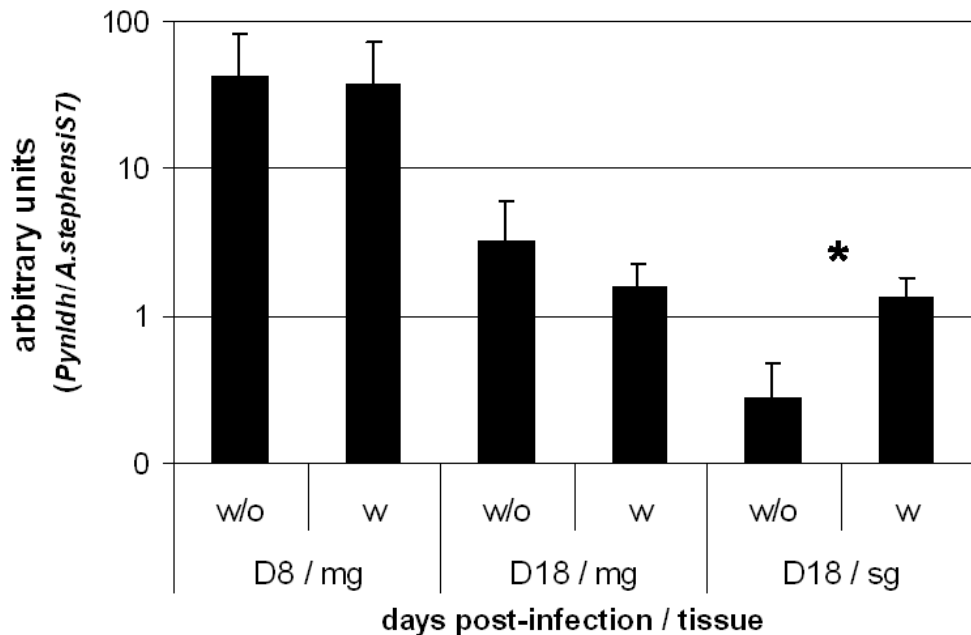

Supplement: MOESM5 [file 9547700]
